# Supplementary material
Source: publisher figshare collection journal article supplement (https://frontiersin.figshare.com/ndownloader/files/13520642)
Supplement: Supplementary file [file 13520642]

## *Supplementary Material*

# **Harnessing Metabolic Regulation to increase Hfq-dependent Antibiotic Susceptibility in *Pseudomonas aeruginosa***

**Petra Pusic<sup>+</sup>, Elisabeth Sonnleitner<sup>\*+</sup>, Beatrice Krennmayr, Dorothea A. Heitzinger, Michael T. Wolfinger, Armin Resch and Udo Bläsi<sup>\*</sup>**

<sup>+</sup> These authors contributed equally to this work

**\* Correspondence:**

Elisabeth Sonnleitner: [elisabeth.sonnleitner@univie.ac.at](mailto:elisabeth.sonnleitner@univie.ac.at)

Udo Bläsi: [udo.blaesi@univie.ac](mailto:udo.blaesi@univie.ac)

## 1 Supplementary Figures and Tables

### 1.1 Supplementary Tables

**Supplementary Table S1.** Susceptibility of PAO1 and PAO1 $\Delta hfq$  towards different classes of antibiotics in LB medium.

| Classes/Subclass                                 | Antibiotic    | Mode of action    | MIC  | PAO1                       | PAO1 $\Delta hfq$ | PAO1                      | PAO1 $\Delta hfq$ |
|--------------------------------------------------|---------------|-------------------|------|----------------------------|-------------------|---------------------------|-------------------|
| SCFM                                             |               |                   |      | High inoculum <sup>a</sup> |                   | Low inoculum <sup>b</sup> |                   |
| <b><math>\beta</math>-Lactam antibiotics</b>     |               |                   |      |                            |                   |                           |                   |
| Cephems/Cephalosporins IV                        | Cefepime      | cell wall         | mg/L | 1.5/1.5                    | 1.5/1.5           | 0.5/0.38                  | 0.5/0.38          |
| Penems/Carbapenems                               | Imipenem      | cell wall         | mg/L | 2/2                        | 1/1               | 1/1                       | 0.5/0.25          |
| <b>Non-<math>\beta</math>-Lactam antibiotics</b> |               |                   |      |                            |                   |                           |                   |
| Aminoglycosides                                  | Gentamicin    | protein synthesis | mg/L | 4/4                        | 0.25/0.5          | 2/2                       | 0.5/0.25          |
| Fluoroquinolones                                 | Ciprofloxacin | DNA metabolism    | mg/L | 0.12/0.12                  | 0.03/0.06         | 0.06/0.06                 | 0.008/0.008       |
| Fosfomycins                                      | Fosfomycin    | cell wall         | mg/L | >1024/>1024                | 24/16             | 46/46                     | 32/32             |
| Lipopeptides/Polymixins                          | Colistin      | cell membrane     | mg/L | 1/1.5                      | 0.38/0.5          | 0.75/0.75                 | 0.094/0.064       |
| Tetracyclines                                    | Tetracycline  | protein synthesis | mg/L | 16/16                      | 8/8               | 8/16                      | 4/4               |

/, results of two independent experiments; >, more resistant than the highest concentration tested.

<sup>a, b</sup> See Table 1.

**Supplementary Table S2** Transcripts with increased abundance in PA14 $\Delta$ *hfq* versus PA14.

**Supplementary Table S3** Transcripts with decreased abundance in PA14 $\Delta$ *hfq* versus PA14.

## 1.2 Supplementary Figures

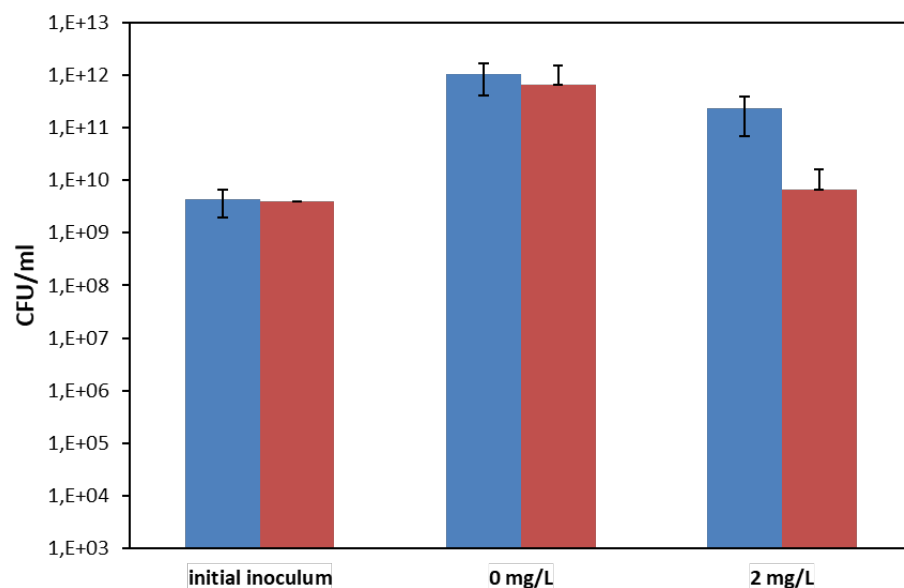

**Supplementary Figure S1** Viability of early stationary phase cells of PA14 and PA14Δ*hfq* after treatment with gentamicin. Determination of the CFUs of PA14 (blue bars) and PA14Δ*hfq* (red bars) at an OD<sub>600</sub> of 2.0 (initial inoculum) and in the absence (0 mg/L) or presence (2 mg/L) of gentamicin after 18 h of static growth in SCFM.

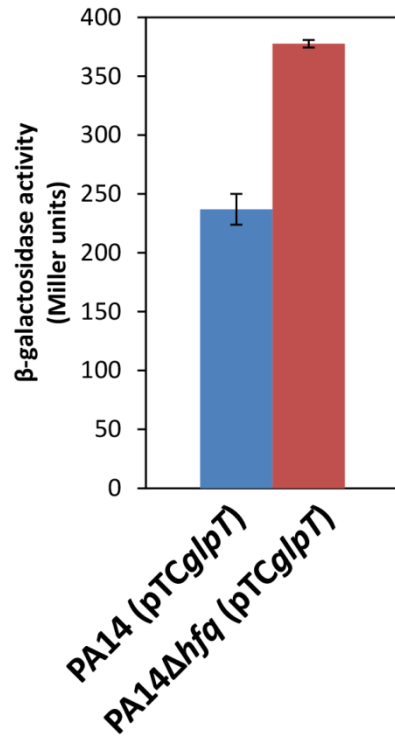

**Supplementary Figure S2** The transcription of *glpT* is increased in the absence of Hfq. The strains PA14 (pTC*glpT*) (blue bar) and PA14Δ*hfq* (pTC*glpT*) (red bar) were grown in SCFM. Samples were withdrawn at an OD<sub>600</sub> of 2.0. The bars represent the β-galactosidase values conferred by the plasmid pTC*glpT* encoded transcriptional *glpR-lacZ* fusion gene in the presence or absence of *hfq*. The error bars represent standard deviations from three independent experiments.

## PAO1

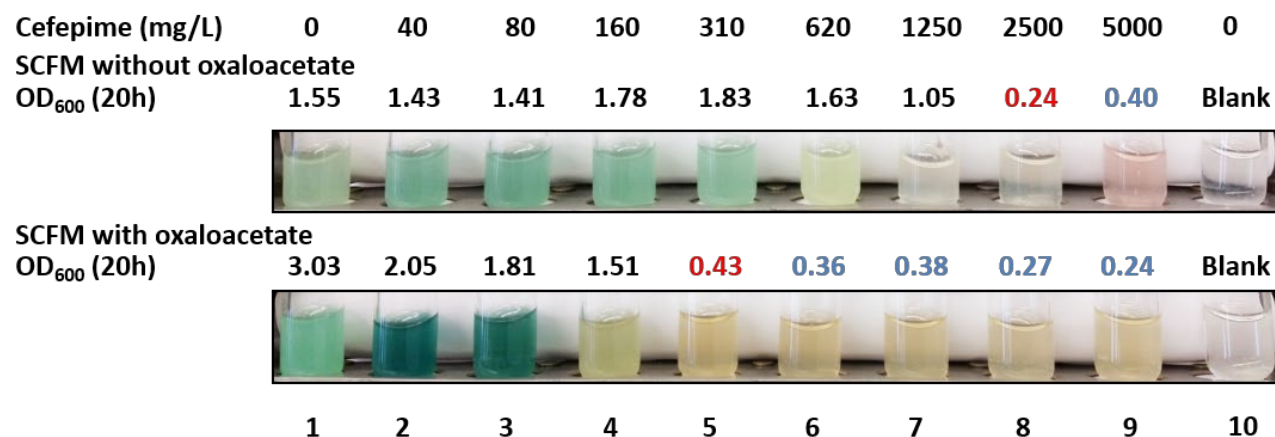

**Supplementary Figure S3** Addition of OAA to SCFM results in increased sensitivity of PAO1 towards cefepime. The PAO1 culture was diluted to an initial OD<sub>600</sub> of 0.5 and incubated for 20 h in SCFM with or without 40 mM OAA in the presence of different cefepime concentrations as indicated on top. Pictures were taken and the OD<sub>600</sub> was measured 20 h after inoculation. The antibiotic concentrations in the presence of which the cells did not grow above OD<sub>600</sub> of 0.5 (marked in red) were considered as MIC. All OD<sub>600</sub> values obtained above this cefepime concentration are depicted in blue indicating toxicity. The experiments were performed in duplicate, revealing the same MICs. Only one representative experiment is shown.
